# Supplementary material for: Enzymatic catalysis on conducting graphite particles
Source: Springer Nature journal article supplement (doi:10.1038/nchembio.2007.47), 2007-11-11
Supplement: 41589_2007_BFnchembio200747_MOESM1_ESM.mol [file 41589_2007_BFnchembio200747_MOESM1_ESM.mol]

  Chem3D  10160715053D

 12 11  0  0  0  0  0  0  0  0999 V2000
    1.8700    0.4930    0.0000 C   0  0  0  0  0  0  0  0  0  0  0  0
    0.6070   -0.2950    0.0000 C   0  0  0  0  0  0  0  0  0  0  0  0
   -0.6070    0.2950    0.0000 C   0  0  0  0  0  0  0  0  0  0  0  0
   -1.8700   -0.4930   -0.0000 C   0  0  0  0  0  0  0  0  0  0  0  0
    2.9452   -0.0900   -0.0000 O   0  0  0  0  0  0  0  0  0  0  0  0
    1.8971    1.8415    0.0000 O   0  0  0  0  0  0  0  0  0  0  0  0
   -2.9452    0.0900    0.0000 O   0  0  0  0  0  0  0  0  0  0  0  0
   -1.8971   -1.8415   -0.0000 O   0  0  0  0  0  0  0  0  0  0  0  0
    0.6873   -1.3945    0.0000 H   0  0  0  0  0  0  0  0  0  0  0  0
   -0.6873    1.3945    0.0000 H   0  0  0  0  0  0  0  0  0  0  0  0
    2.8246    2.1274    0.0000 H   0  0  0  0  0  0  0  0  0  0  0  0
   -2.8246   -2.1274    0.0000 H   0  0  0  0  0  0  0  0  0  0  0  0
  1  2  1  0      
  1  5  2  0      
  1  6  1  0      
  2  3  2  0      
  2  9  1  0      
  3  4  1  0      
  3 10  1  0      
  4  7  2  0      
  4  8  1  0      
  6 11  1  0      
  8 12  1  0      
M  END
